# Supplementary material for: Cell membrane inspired nano-shell enabling long-acting Glucose Oxidase for Melanoma starvation therapy via microneedles-based percutaneous delivery
Source: Theranostics. 2021 Jul 13;11(17):8270–82. doi: 10.7150/thno.60758 (PMC8344000; doi:10.7150/thno.60758)
Supplement: Supplementary file 1 — Supplementary figures. [file thnov11p8270s1.pdf]

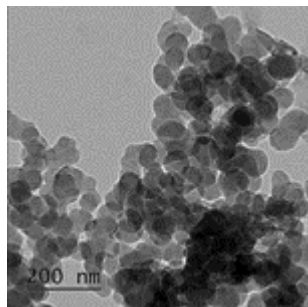

**Figure S1.** The TEM image of NCPs/GOx.

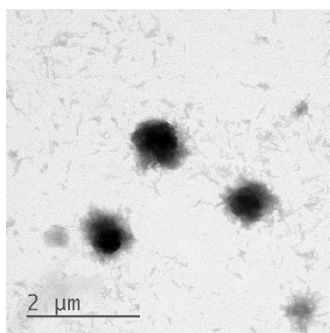

**Figure S2.** The TEM image of GOx@PDA.

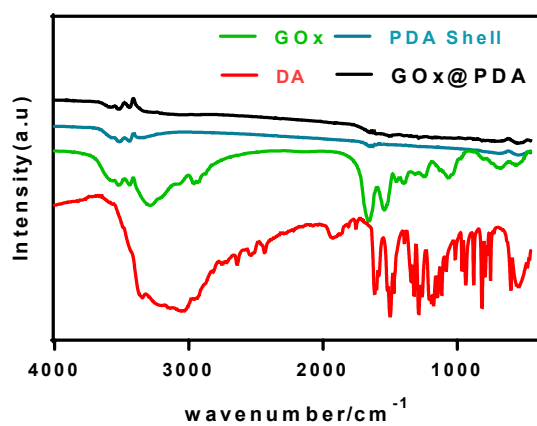

**Figure S3.** FT-IR spectra of GOx, DA, PDA shell and GOx@PDA.

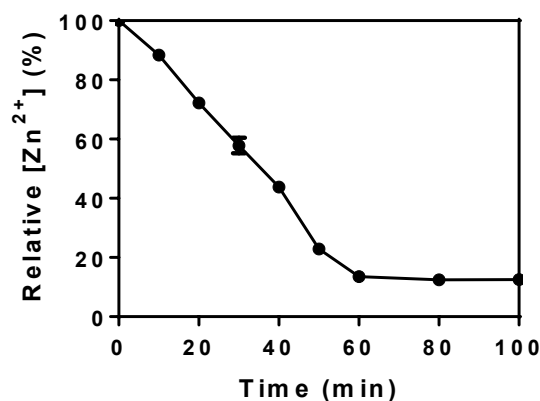

**Figure S4.** The relative content of  $\text{Zn}^{2+}$  in NCPs/GOx@PDA after different etching time periods.

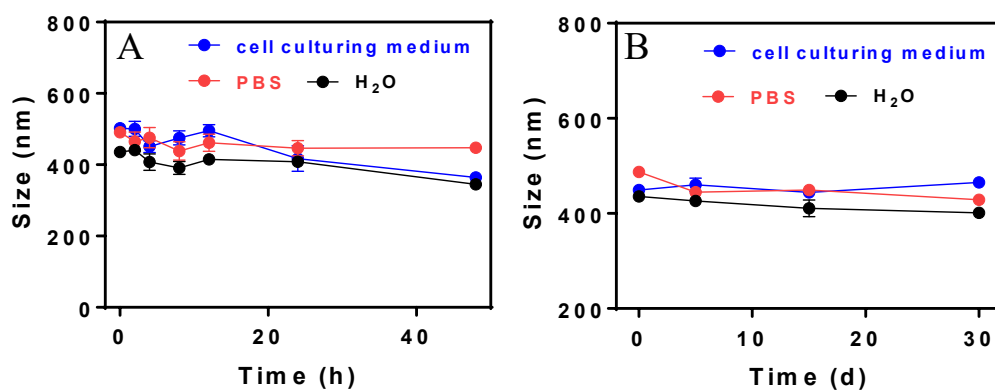

**Figure S5.** (A) Dynamic particle size change of GOx@PDA in water, PBS (pH 7.4), and cell culturing medium at 37 ° C for 48 h incubation. (B) The long-term colloidal stability of GOx@PDA at 4 ° C.

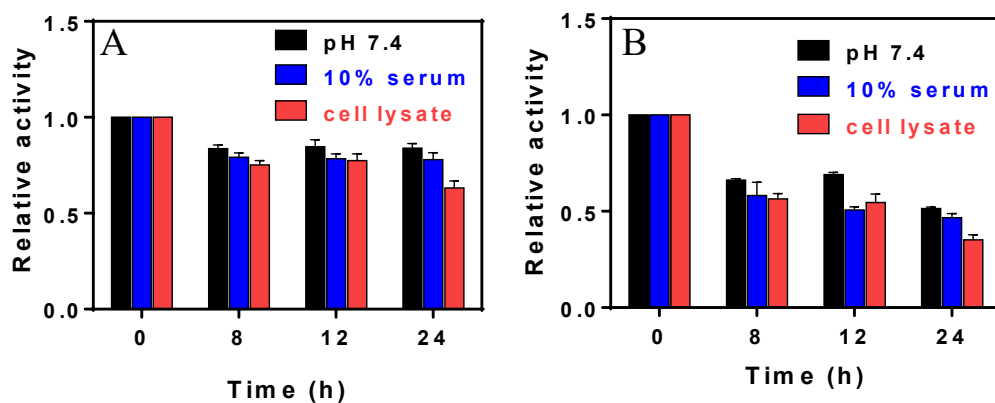

**Figure S6.** (A) Relative catalytic activity of (A) GOx@PDA and (B) free GOx after incubation with PBS buffer (pH 7.4), 10% serum and cell lysate obtained from B16F10 melanoma cells for different time periods at 37 ° C.

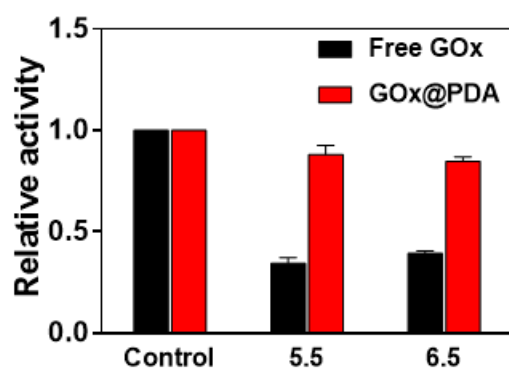

**Figure S7.** Relative activity of GOx@PDA and free GOx after treatments with phosphate buffers (pH 5.5 and pH 6.5) for 10 min.

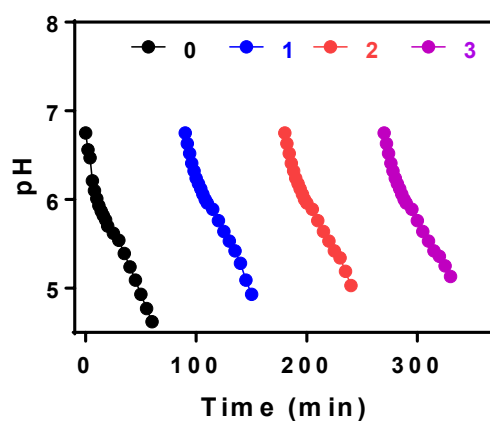

**Figure S8.** Catalytic activity of GOx@PDA after various rounds of treatment with proteinase by monitoring the pH decrease.

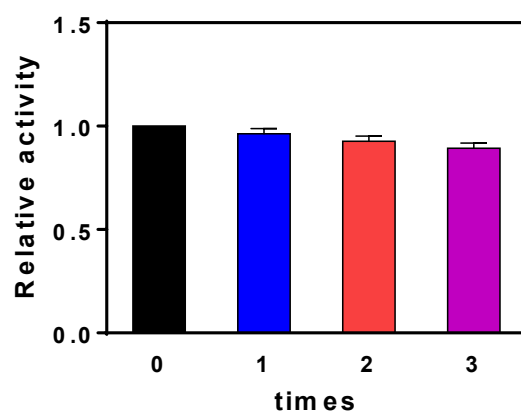

**Figure S9.** Catalytic activity of GOx@PDA after various rounds of treatment with proteinase by monitoring oxygen consumption.

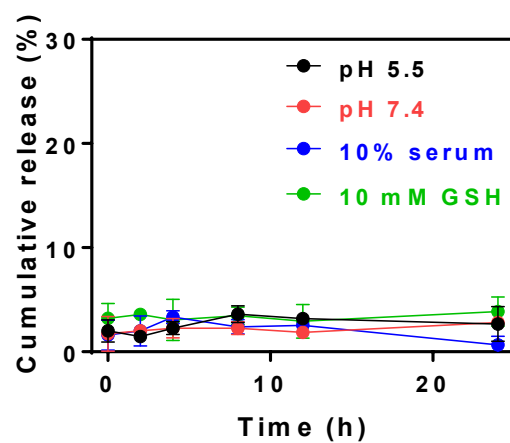

**Figure S10.** The release GOx from GOx@PDA under different conditions.

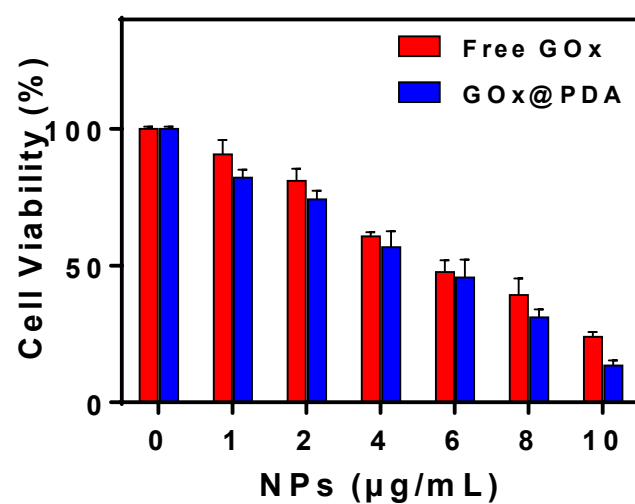

**Figure S11.** Cell activity of B16F10 cells after treatment with free GOx and GOx@PDA at different concentrations for 48 h.

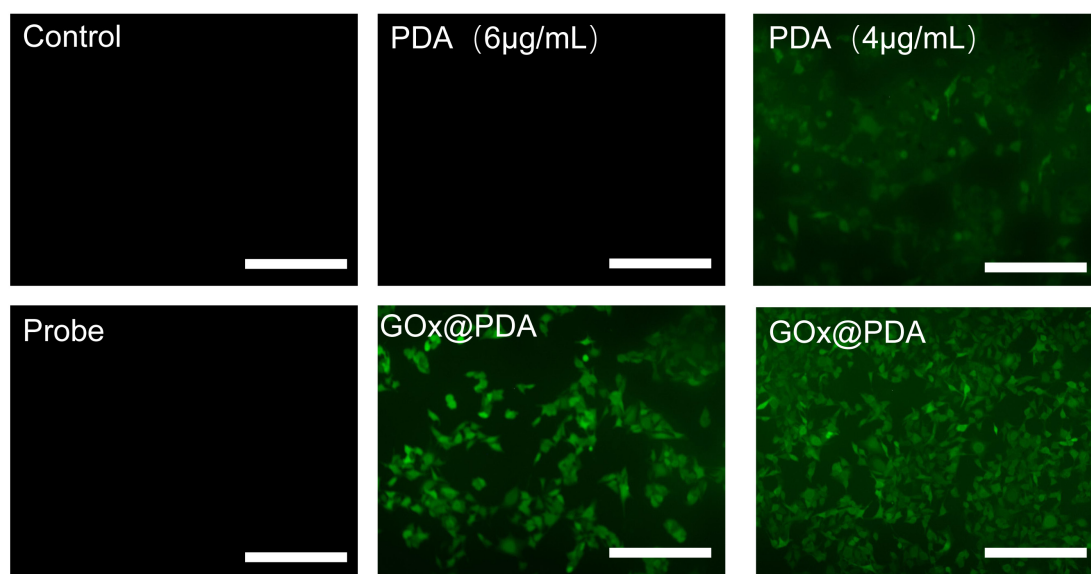

**Figure S12.** Fluorescent images of B16F10 cells treated with PDA shell and GOx@PDA for 6 h and then incubated with DCFH-DA for 30 min. Scale bars, 100 µm.

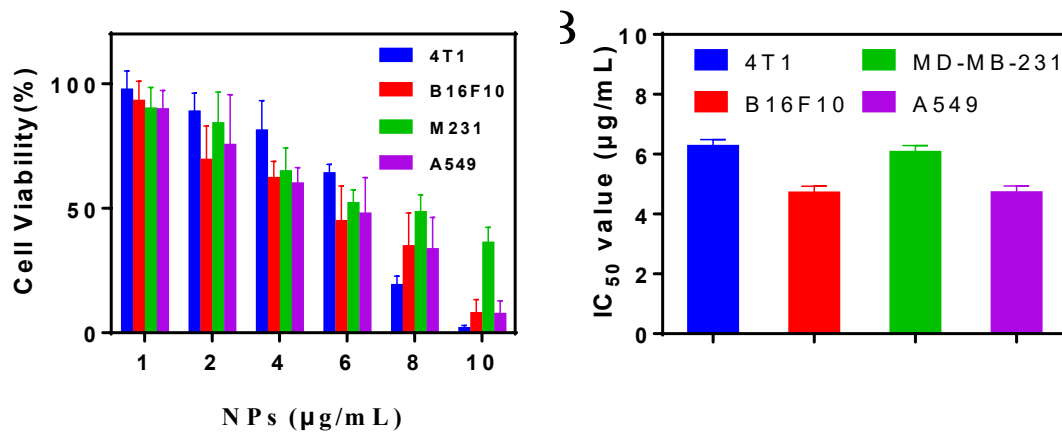

**Figure S13.** (A) Cell viability and (B) IC<sub>50</sub> values of GOx@PDA for various types of tumor cells after 48 h incubation.

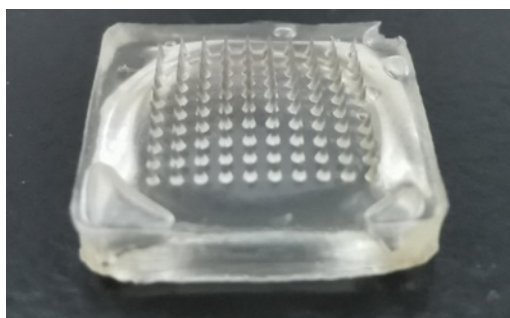

**Figure S14.** High-resolution digital image of the blank MNs

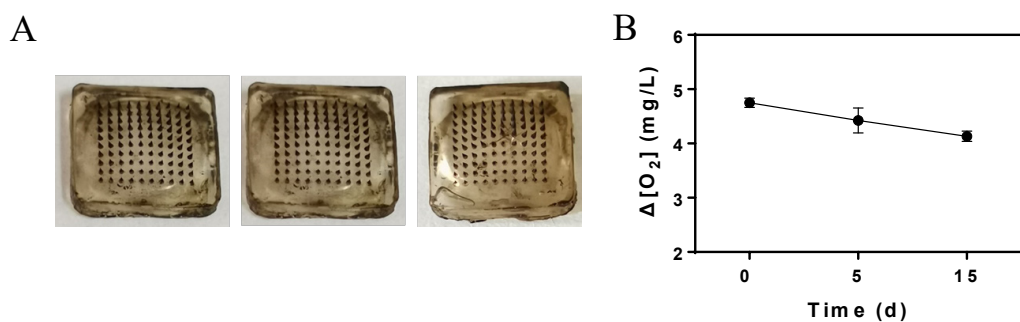

**Figure S15.** (A) The stability of MNs in a silica gel environment for 15 d storage. (B) The catalytic activity of GOx in MNs for 15 d storage.

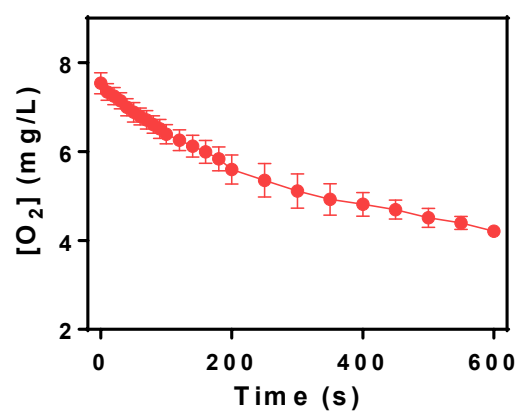

**Figure S16.** Quantification of the skin penetrated GOx@PDA by measuring the catalytic activity of GOx.

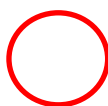

**Figure S17.** The nanoparticles in receiving solution were collected by centrifugation to demonstrate their successful penetration.

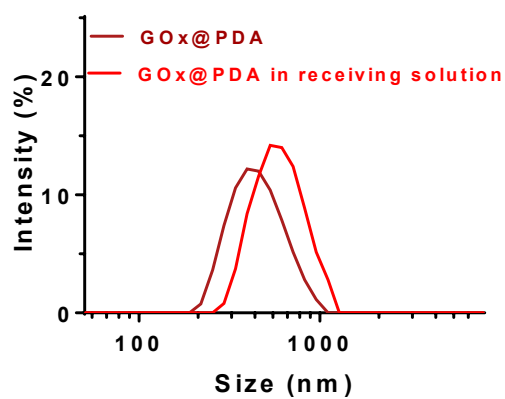

**Figure S18.** DLS measuring the size of GOx@PDA before and after penetration into skin.

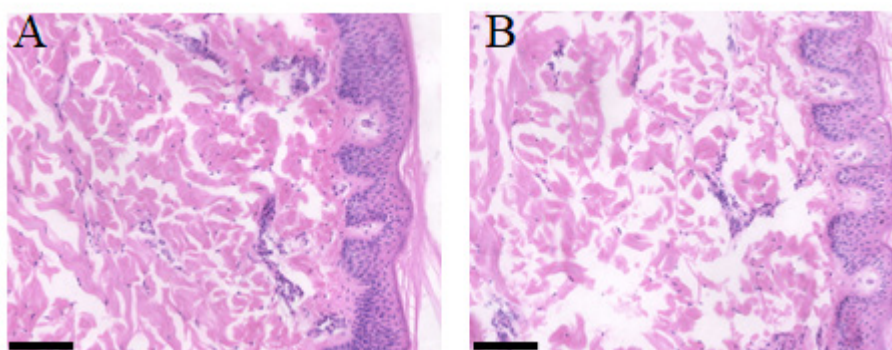

**Figure S19.** H&E staining of mouse skin without (A) or with (B) treatment of GOx@PDA MNs.

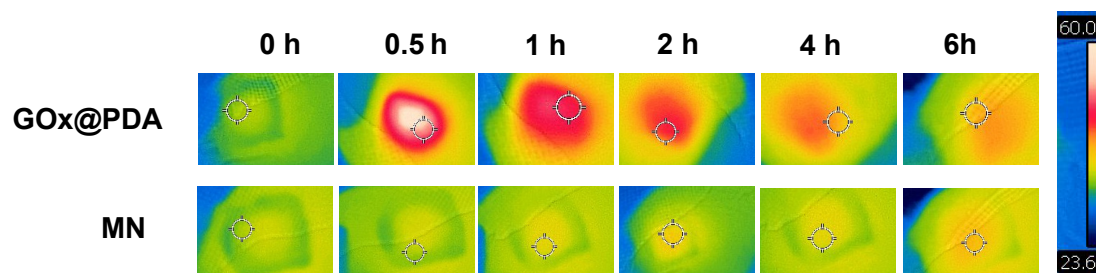

**Figure S20.** Photothermal imaging of mice treated with GOx@PDA MNs and blank MNs after laser irradiation.

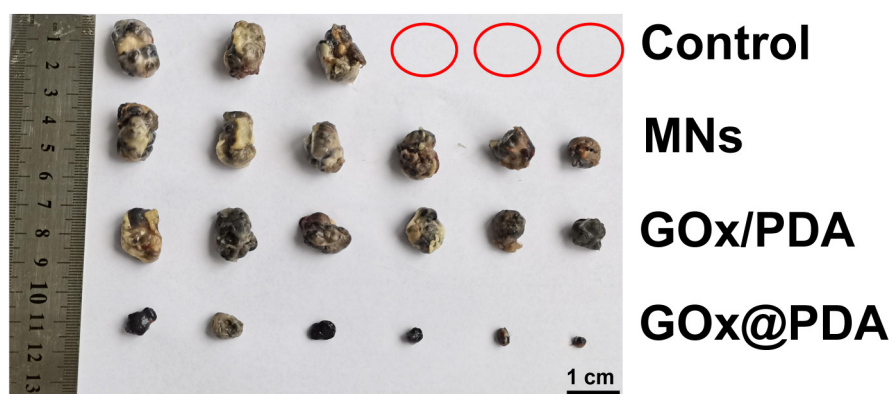

**Figure S21.** Photographs of the harvested tumors after different treatments, and the blank space indicates complete tumor eradication.

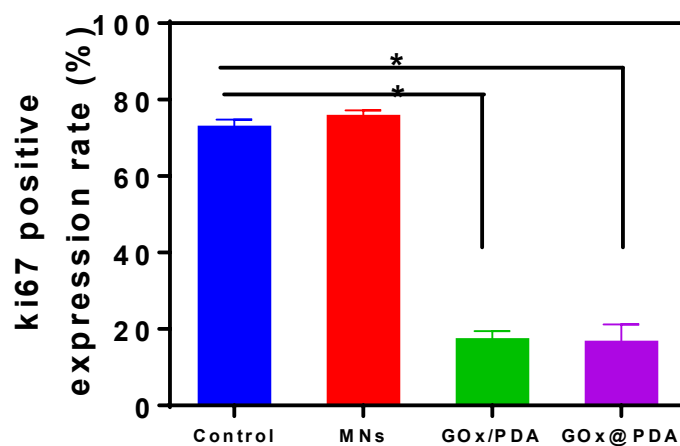

**Figure S22.** Quantified Ki67 immunofluorescent intensity after different treatments.

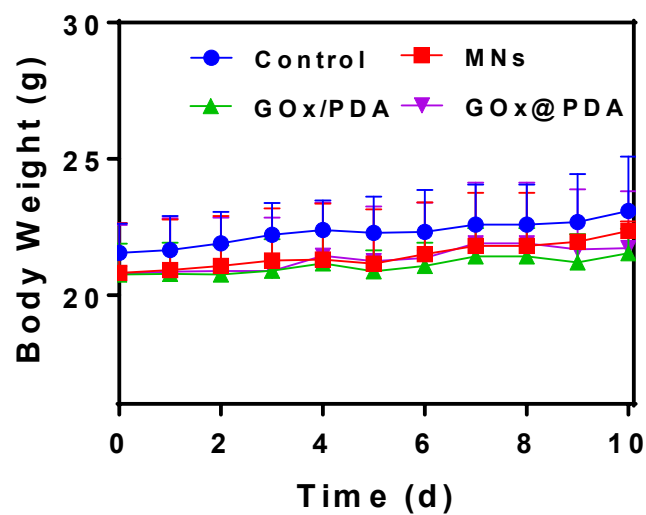

**Figure S23.** Dynamic monitoring the body weight of the mice during different treatments.

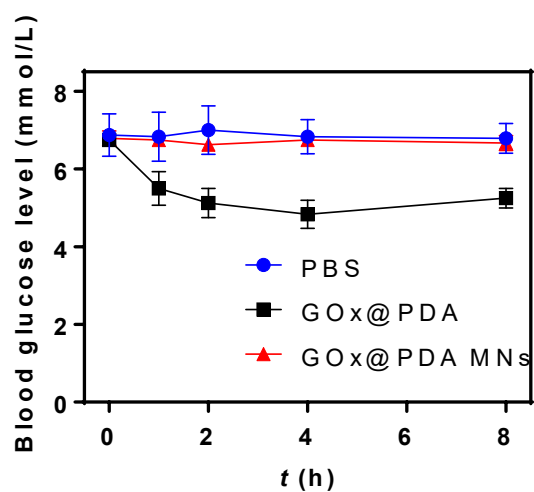

**Figure S24.** Dynamic monitoring the blood glucose level after different treatments.

GOx@PDA were administrated via intravenous injection, while GOx@PDA MNs were topically delivered.

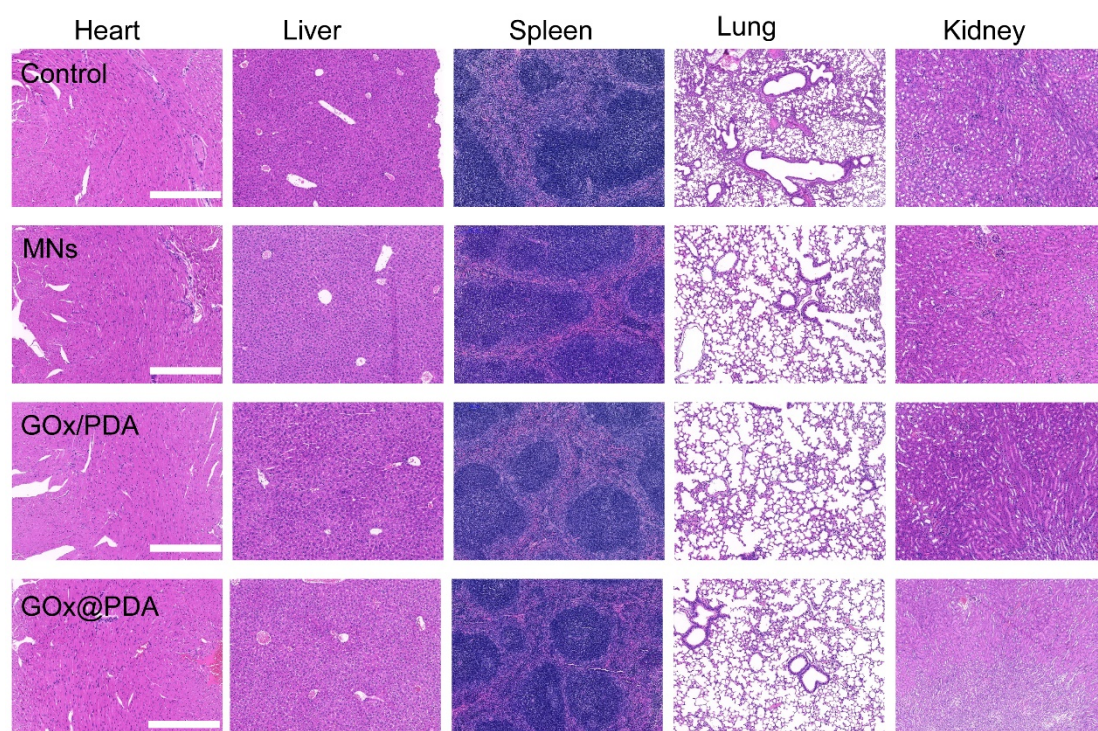

**Figure S25.** H&E staining of the main organs from mice after different treatments.
